# Supplementary material
Source: PubMed Central journal article supplement (PMC5858977)
Supplement: NIHMS941688-supplement-1.pdf [file NIHMS941688-supplement-1.pdf]

## **SUPPLEMENTAL INFORMATION**

### **Neuroimaging Meta-Analysis of Cannabis-Use Studies Reveals Convergent Functional Alterations in Brain Regions Supporting Cognitive Control and Reward Processing**

Julio A. Yanes, Michael C. Riedel, Kimberly L. Ray, Anna E. Kirkland, Ryan T. Bird, Emily R. Boeving, Meredith A. Reid, Raul Gonzalez, Jennifer L. Robinson, Angela R. Laird, and Matthew T. Sutherland

## **SUPPLEMENTAL CONTENT**

### **SUPPLEMENTAL TABLES**

- Supplemental Table S1: MACM Coordinates for Cannabis-Affected Regions
- Supplemental Table S2: Forward-Inference Analysis for Cannabis-Affected Regions

### **SUPPLEMENTAL FIGURES**

- Figure S1: Cannabis Abstinence Stratified ALE Meta-Analysis Results

**Table S1.** Meta-Analytic Connectivity Modeling (MACM) Coordinates for Cannabis-Affected Regions

| Cluster No. | MACM Extrema Label (within +/-5mm) | BA | Hemisphere | x   | y   | z  |
|-------------|------------------------------------|----|------------|-----|-----|----|
| 1 (ACC)     |                                    |    |            |     |     |    |
|             | Cingulate Gyrus                    | 32 | L          | -4  | 18  | 38 |
|             | Insula                             | 13 | L          | -32 | 18  | 4  |
|             | Insula                             | NA | R          | 32  | 20  | 2  |
|             | Thalamus                           | NA | L          | -10 | -18 | 8  |
|             | Anterior Cingulate Gyrus           | 32 | L          | -4  | 30  | 22 |
|             | Thalamus                           | NA | R          | 8   | -18 | 8  |
|             | Inferior Frontal Gyrus             | 9  | L          | -44 | 4   | 32 |
|             | Lentiform Nucleus                  | NA | R          | 14  | 4   | 6  |
|             | Inferior Frontal Gyrus             | 9  | L          | -44 | 12  | 24 |
|             | Inferior Frontal Gyrus             | 9  | R          | 44  | 8   | 30 |
|             | Lentiform Nucleus                  | NA | L          | -20 | 6   | 4  |
|             | Superior Parietal Lobule           | 7  | L          | -28 | -62 | 44 |
|             | Middle Frontal Gyrus               | 9  | R          | 40  | 30  | 26 |
|             | Superior Parietal Lobule           | 7  | R          | 28  | -62 | 40 |
|             | Inferior Parietal Lobule           | 40 | R          | 40  | -48 | 40 |
|             | Precentral Gyrus                   | 6  | L          | -28 | -8  | 48 |
|             | Precentral Gyrus                   | 6  | L          | -40 | -4  | 46 |
|             | Middle Frontal Gyrus               | 10 | L          | -36 | 42  | 22 |
|             | Precentral Gyrus                   | 6  | R          | 46  | -4  | 44 |
|             | Inferior Parietal Lobule           | 40 | L          | -46 | -40 | 40 |
|             | Insula                             | 40 | R          | 54  | -20 | 16 |
|             | Postcentral Gyrus                  | 40 | R          | 56  | -22 | 20 |
|             | Postcentral Gyrus                  | 40 | L          | -58 | -24 | 20 |
|             | Cingulate Gyrus                    | 23 | L          | 0   | -30 | 28 |
|             | Middle Frontal Gyrus               | 10 | L          | -36 | 48  | 10 |
|             | Lentiform Nucleus                  | NA | R          | 18  | -2  | -8 |
|             | Inferior Parietal Lobule           | 40 | L          | -54 | -42 | 22 |
|             | Supramarginal Gyrus                | 40 | R          | 54  | -38 | 28 |
|             | Middle Frontal Gyrus               | 6  | R          | 26  | -4  | 50 |
|             | Supramarginal Gyrus                | 40 | R          | 52  | -42 | 34 |
|             | Middle Temporal Gyrus              | 22 | L          | -50 | -40 | 4  |
|             | Middle Frontal Gyrus               | 10 | R          | 32  | 48  | 20 |
|             | Precuneus                          | 7  | L          | -10 | -68 | 46 |
|             | Precentral Gyrus                   | 6  | L          | -50 | -12 | 34 |
|             | Sub-Gyral Gray Matter              | 6  | R          | 26  | 4   | 52 |
|             | Precuneus                          | 7  | R          | 6   | -70 | 44 |
|             | Superior Temporal Gyrus            | 22 | R          | 46  | -30 | 0  |
|             | Thalamus                           | NA | L          | -24 | -24 | 0  |
|             | Precuneus                          | 31 | L          | -24 | -80 | 28 |

Note. Table continued on next page.

**Table S1 (continued).**

| Cluster No. | MACM Extrema Label (within +/-5mm) | BA | Hemisphere | x   | y   | z   |
|-------------|------------------------------------|----|------------|-----|-----|-----|
| 2 (DL-PFC)  |                                    |    |            |     |     |     |
|             | Precentral Gyrus                   | 6  | R          | 44  | 4   | 34  |
|             | Insula                             | 13 | R          | 32  | 18  | 6   |
|             | Lentiform Nucleus                  | NA | R          | 20  | 2   | 6   |
|             | Middle Frontal Gyrus               | 9  | R          | 44  | 22  | 28  |
|             | Insula                             | 13 | R          | 44  | 12  | 12  |
|             | Lentiform Nucleus                  | NA | L          | -20 | 2   | 6   |
|             | Caudate                            | NA | R          | 14  | -2  | 16  |
|             | Caudate                            | NA | L          | -14 | 0   | 12  |
|             | Middle Frontal Gyrus               | 9  | R          | 42  | 32  | 26  |
|             | Thalamus                           | NA | R          | 10  | -8  | 8   |
|             | Middle Frontal Gyrus               | 10 | R          | 34  | 44  | 24  |
|             | Parahippocampal Gyrus              | NA | L          | -18 | -6  | -10 |
|             | Precentral Gyrus                   | 6  | L          | -44 | -2  | 36  |
|             | Precentral Gyrus                   | 6  | L          | -28 | -10 | 50  |
|             | Inferior Parietal Lobule           | 40 | L          | -42 | -38 | 40  |
|             | Fusiform Gyrus                     | 37 | L          | -46 | -58 | -12 |
|             | Insula                             | 13 | L          | -46 | -40 | 16  |
|             | Postcentral Gyrus                  | 40 | L          | -38 | -26 | 44  |
|             | Transverse Temporal Gyrus          | 41 | L          | -40 | -32 | 12  |
|             | Precentral Gyrus                   | 6  | R          | 48  | 2   | 36  |
|             | Superior Temporal Gyrus            | 22 | R          | 48  | -32 | 4   |
|             | Superior Temporal Gyrus            | 22 | R          | 50  | -28 | 4   |
|             | Superior Temporal Gyrus            | 22 | R          | 50  | 6   | 2   |
|             | Superior Temporal Gyrus            | 22 | R          | 50  | -10 | 2   |
|             | Postcentral Gyrus                  | 40 | R          | 56  | -24 | 24  |
|             | Inferior Parietal Lobule           | 40 | R          | 56  | -32 | 34  |
|             | Insula                             | 13 | L          | -32 | 18  | 8   |
|             | Inferior Frontal Gyrus             | 9  | L          | -46 | 8   | 30  |
|             | Middle Frontal Gyrus               | 46 | L          | -44 | 22  | 26  |
|             | Middle Frontal Gyrus               | 10 | L          | -38 | 42  | 22  |
|             | Superior Parietal Lobule           | 7  | R          | 30  | -58 | 44  |
|             | Inferior Occipital Gyrus           | 19 | R          | 36  | -76 | -4  |
|             | Supramarginal Gyrus                | 40 | R          | 54  | -36 | 36  |
|             | Lingual Gyrus                      | 18 | R          | 26  | -80 | -8  |

Note. Table continued on next page.

**Table S1 (continued).**

| <b>Cluster No.</b> | <b>MACM Extrema Label (within +/-5mm)</b> | <b>BA</b> | <b>Hemisphere</b> | <b>x</b> | <b>y</b> | <b>z</b> |
|--------------------|-------------------------------------------|-----------|-------------------|----------|----------|----------|
| 3 (Striatum)       |                                           |           |                   |          |          |          |
|                    | Clastrum                                  | NA        | R                 | 32       | 16       | 2        |
|                    | Caudate                                   | NA        | R                 | 12       | 6        | 6        |
|                    | Insula                                    | 13        | L                 | -32      | 18       | 4        |
|                    | Lentiform Nucleus                         | NA        | L                 | -12      | 4        | 4        |
|                    | Thalamus                                  | NA        | L                 | -12      | -16      | 8        |
|                    | Thalamus                                  | NA        | R                 | 6        | -16      | 8        |
|                    | Inferior Frontal Gyrus                    | 9         | R                 | 44       | 6        | 28       |
|                    | Inferior Parietal Lobule                  | 40        | L                 | -32      | -54      | 42       |
|                    | Inferior Frontal Gyrus                    | 9         | L                 | -46      | 4        | 28       |
|                    | Middle Frontal Gyrus                      | 46        | R                 | 40       | 34       | 24       |
|                    | Precentral Gyrus                          | 6         | L                 | -42      | -4       | 44       |
|                    | Middle Frontal Gyrus                      | 46        | L                 | -42      | 26       | 24       |
|                    | Middle Frontal Gyrus                      | 6         | R                 | 42       | -2       | 46       |
|                    | Middle Frontal Gyrus                      | 10        | R                 | 34       | 46       | 20       |
|                    | Precentral Gyrus                          | 6         | L                 | -28      | -8       | 50       |
|                    | Precentral Gyrus                          | 6         | R                 | 30       | -6       | 50       |
|                    | Middle Frontal Gyrus                      | 10        | L                 | -36      | 42       | 22       |
|                    | Sub-Gyral Gray Matter                     | 6         | R                 | 28       | 2        | 54       |
|                    | Middle Frontal Gyrus                      | 10        | R                 | 30       | 52       | 6        |
|                    | Supramarginal Gyrus                       | 40        | L                 | -54      | -48      | 30       |
|                    | Insula                                    | 40        | L                 | -48      | -24      | 16       |
|                    | Superior Temporal Gyrus                   | 13        | L                 | -54      | -40      | 20       |
|                    | Inferior Frontal Gyrus                    | 46        | R                 | 44       | 36       | 8        |
|                    | Precentral Gyrus                          | 4         | R                 | 46       | -14      | 38       |
|                    | Medial Frontal Gyrus                      | 32        | L                 | -2       | 8        | 46       |
|                    | Cingulate Gyrus                           | 32        | L                 | 0        | 18       | 40       |
|                    | Anterior Cingulate Gyrus                  | 24        | L                 | -2       | 32       | 14       |
|                    | Superior Parietal Lobule                  | 7         | R                 | 28       | -62      | 40       |
|                    | Inferior Parietal Lobule                  | 40        | R                 | 38       | -48      | 40       |
|                    | Inferior Parietal Lobule                  | 40        | R                 | 46       | -40      | 42       |
|                    | Inferior Parietal Lobule                  | 40        | R                 | 54       | -44      | 30       |
|                    | Postcentral Gyrus                         | 40        | R                 | 58       | -24      | 20       |
|                    | Middle Temporal Gyrus                     | 21        | R                 | 52       | -42      | 8        |
|                    | Precuneus                                 | 31        | R                 | 28       | -74      | 22       |
|                    | Precuneus                                 | 7         | R                 | 8        | -72      | 44       |

Note: Local extrema coordinates and associated labels of MACM maps shown in main text Figure 3. Coordinates (x, y, z) are reported in Talairach Space and extrema labels were determined via the Talairach Daemon. BA, Brodmann Area; NA, not applicable; R, right; L, left.

**Table S2.** Forward-Inference Analysis for Cannabis-Affected Regions

| <b>Cluster No.</b>                      | <b>Task Classification</b>  | <b>Likelihood Ratio</b> |
|-----------------------------------------|-----------------------------|-------------------------|
| <i>Decreases (Users &lt; Non-Users)</i> |                             |                         |
| 1 (ACC)                                 | Flanker Task                | 2.99*                   |
|                                         | Stroop Task                 | 1.97*                   |
|                                         | Pain Monitor/Discrimination | 1.75*                   |
|                                         | Go/No-Go                    | 1.12                    |
|                                         | Passive Listening           | 0.46                    |
| 2 (DL-PFC)                              |                             |                         |
|                                         | Saccades                    | 2.83*                   |
|                                         | Visual Pursuit/Tracking     | 2.05                    |
|                                         | Recitation/Repetition       | 1.90                    |
|                                         | Flexion/Extension           | 1.68                    |
|                                         | Delayed Match to Sample     | 1.43                    |
|                                         | Reading                     | 1.43                    |
|                                         | Film Viewing                | 1.41                    |
|                                         | Go/No-Go                    | 1.26                    |
|                                         | Reward                      | 0.52                    |
| <i>Increases (Users &gt; Non-Users)</i> |                             |                         |
| 3 (Striatum)                            | Reward                      | 2.46*                   |
|                                         | Pain Monitor/Discrimination | 1.66*                   |
|                                         | Go/No-Go                    | 1.27                    |
|                                         | Passive Listening           | 0.52                    |

Note: Forward-inference estimates [P(Activation|Process)] used to compute reverse-inference estimates [P(Process|Activation)] using Bayes' rule. \* statistically significant ( $p_{FDR-corrected} < 0.05$ ).

**Figure S1: Cannabis Abstinence Stratified ALE Meta-Analysis Results**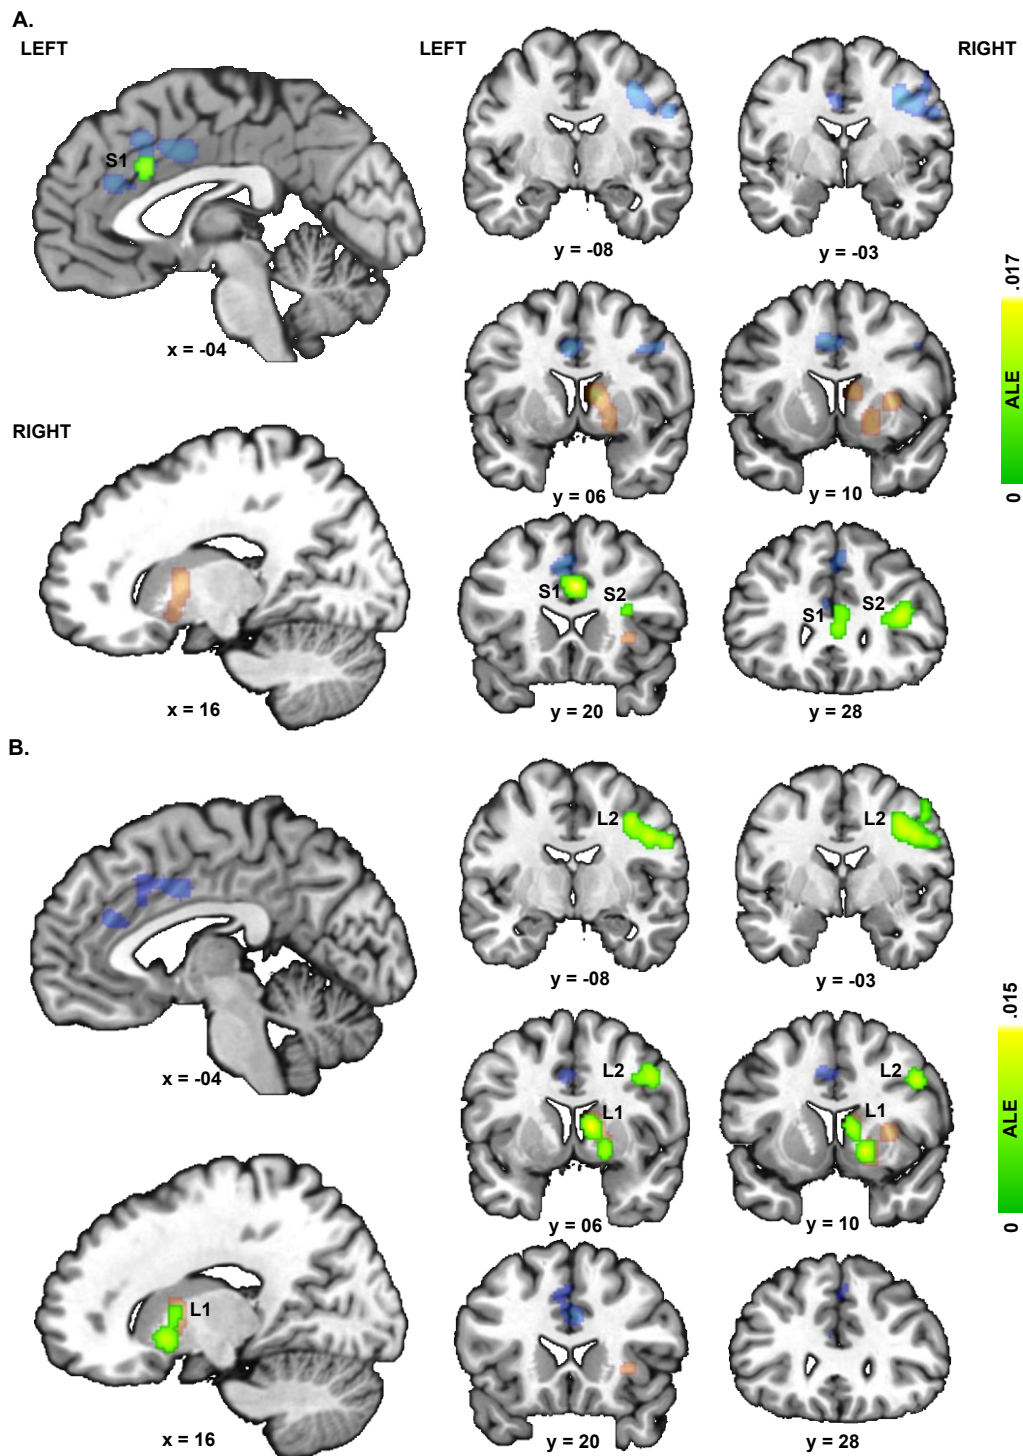

**Note.** (A) An exploratory assessment examined convergence across included studies involving *short-term* abstinence among users (i.e.,  $\leq 48$  hours since last cannabis-use episode;  $n = 19$ , mean = 22.71 hours) identified regional alterations among short-term abstinent users versus non-users. Specifically, convergent alterations were observed in two clusters, one encompassing the anterior

cingulate cortex (A, S1, green), and a second encompassing the right middle frontal gyrus, right inferior frontal gyrus, and right insula (A, S2, green). These clusters showed considerable spatial overlap with Cluster 1 (ACC) described in Table 2 and Figure 2 of the main text. **(B)** Among studies that assessed users involving *long-term* abstinence (i.e., > 48 hours since last cannabis-use episode; n = 14, mean = 98.89 days), convergent alterations were observed in two clusters, one encompassing the caudate and putamen (B, L1, green), and a second encompassing the right precentral gyrus and right middle frontal gyrus (B, L2, green). These clusters showed considerable spatial overlap with Cluster 3 (Striatum) and Cluster 2 (DL-PFC), respectively, described in Table 2 and Figure 2 of the main text. Areas of decreased activation (transparent blue) and increased activation (transparent red) among cannabis users as observed in the primary meta-analysis reported in the main text are included for visual comparison. Current methodological recommendations regarding ALE meta-analyses indicate that ~20 studies are needed to achieve sufficient statistical power allowing for the detection of moderately sized effects (Eickhoff *et al.*, 2016). For this reason, stratified meta-analysis results were obtained using an exploratory approach ( $p_{\text{cluster-corrected}} < 0.1$ ;  $p_{\text{voxel-level}} < 0.01$ ) that involved combining coordinates across the included studies – irrespective of statistical contrast direction – to enable enhanced understanding about cannabis abstinence. ALE maps were computed in Talairach space. Given these exploratory outcomes, it is plausible that the primary meta-analysis results reported in Table 2 and Figure 2 represent distinct neurobiological effects of cannabis: effects associated with *short-term* abstinence (i.e., recent intoxication) and effects associated with *long-term* abstinence (i.e., chronic differences between previous cannabis users versus non-users). It is worth noting that in combining coordinates across studies, neurobiological interpretations regarding directionality become unclear. Nevertheless, exploratory results reported here may augment our primary meta-analysis outcomes, pointing towards potential targets for subsequent studies on the differential effects of cannabis with respect to abstinence.
